# Supplementary material for: Carbon@NiCo2S4 nanorods: an excellent electrode material for supercapacitors
Source: Royal Society of Chemistry journal article supplement (doi:10.1039/c5ra15022a), 2015-01-01
Supplement: c5ra15022a1.pdf [file c5ra15022a1.pdf]

# Carbon@NiCo<sub>2</sub>S<sub>4</sub> Nanorod: An Excellent Electrode Material for Supercapacitors

Laiquan Li, Ziyang Dai, Yufei Zhang, Jun Yang, Wei Huang\*,

Xiaochen Dong\*

Key Laboratory of Flexible Electronics (KLOFE) & Institute of Advanced Materials (IAM), Jiangsu National Synergistic Innovation Center for Advanced Materials (SICAM), Nanjing Tech University (Nanjing Tech), 30 South Puzhu Road, Nanjing 211816, China.

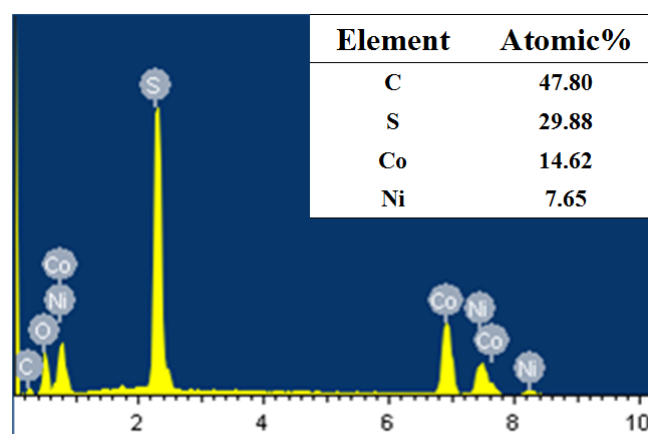

**Fig. S1** EDAX spectrum of C@NiCo<sub>2</sub>S<sub>4</sub>-H nanorods.

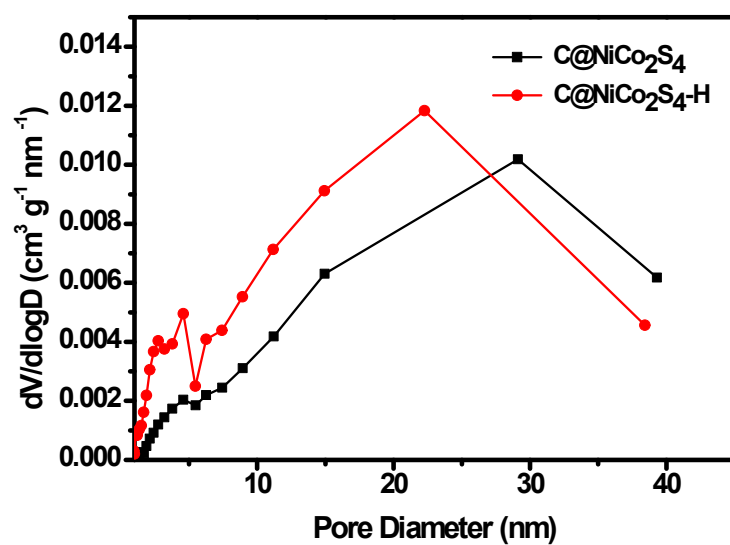

**Fig. S2** Pore size distribution curves of C@NiCo<sub>2</sub>S<sub>4</sub> and C@NiCo<sub>2</sub>S<sub>4</sub>-H nanorods calculated from BJH method.

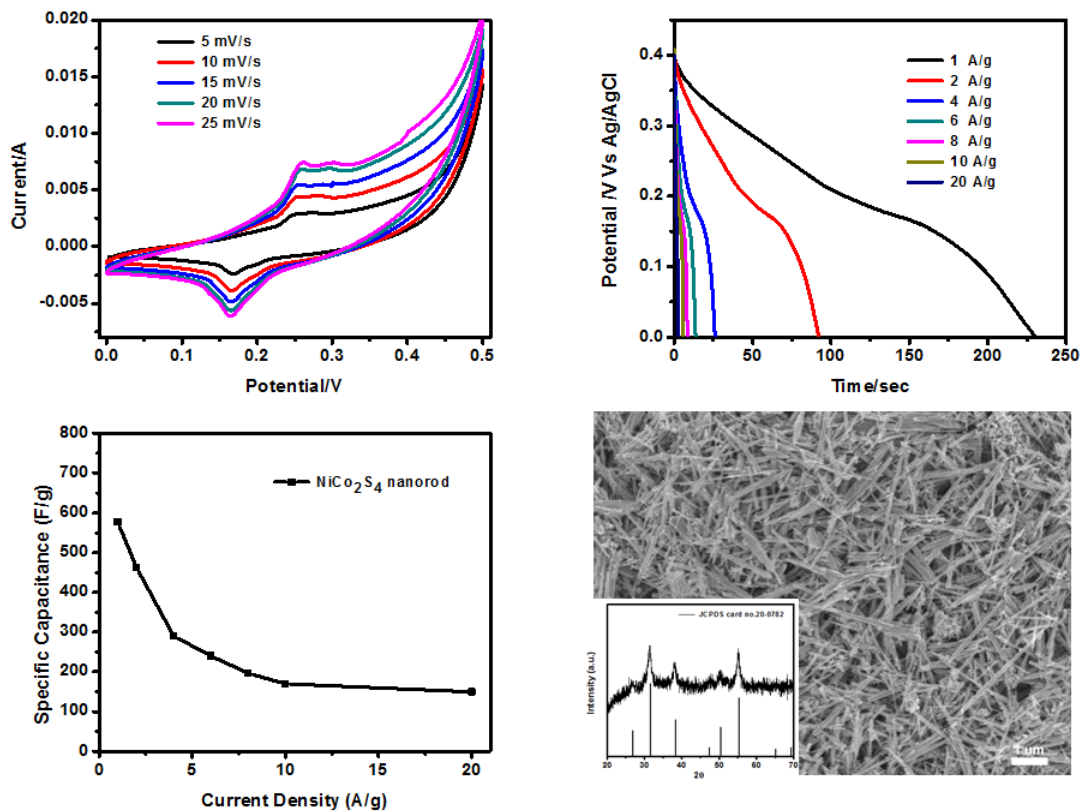

**Fig. S3** Electrochemical performance of NiCo<sub>2</sub>S<sub>4</sub> nanorod. (a) CV curves at different scan rates. (b) Discharge curves at different current densities. (c) Effects of current density on its specific capacitance. (d) SEM image of NiCo<sub>2</sub>S<sub>4</sub> nanorod. The inset shows the XRD pattern.
